# Supplementary material for: Preparation of nickel-bound porous carbon and its application in supercapacitors
Source: Royal Society of Chemistry journal article supplement (doi:10.1039/d1qi01403j), 2022-01-01
Supplement: d1qi01403j1.pdf [file d1qi01403j1.pdf]

## Supporting Information

for

### **Preparation of nickel-bound porous carbon and its application in supercapacitors**

Liangyu Liu<sup>a,b</sup>, Yixin Li<sup>a</sup>, Yanan Meng<sup>a</sup>, Ying Xue<sup>a</sup>, Bin Yang<sup>b\*</sup>, Bing Li<sup>b\*</sup> and Xiaoyang Liu<sup>a\*</sup>

a. State Key Laboratory of Inorganic Synthesis and Preparative Chemistry, College of Chemistry, Jilin University, Changchun 130012, China. Tel/Fax: +86-431-85168316. E-mail: liuxy@jlu.edu.cn

b. Center for High Pressure Science and Technology Advanced Research, Changchun 130012, China.

\* Corresponding authors: Xiaoyang Liu ([liuxy@jlu.edu.cn](mailto:liuxy@jlu.edu.cn)); Bing Li ([libing@hpstar.ac.cn](mailto:libing@hpstar.ac.cn)); Bin Yang ([yangbin@hpstar.ac.cn](mailto:yangbin@hpstar.ac.cn))

#### 1. Preparation process of the working electrode

The working electrode was obtained by pressing the active material film on the nickel foam (~1 cm<sup>2</sup>). The film was created as a result of mixing active material (80 wt%), acetylene black (15 wt%), polytetrafluoroethylene (5 wt%), and a small amount of ethanol followed by grounding and flattening. After the process, the electrode was dried in an oven at 60°C for 2 h before testing

Figure S1

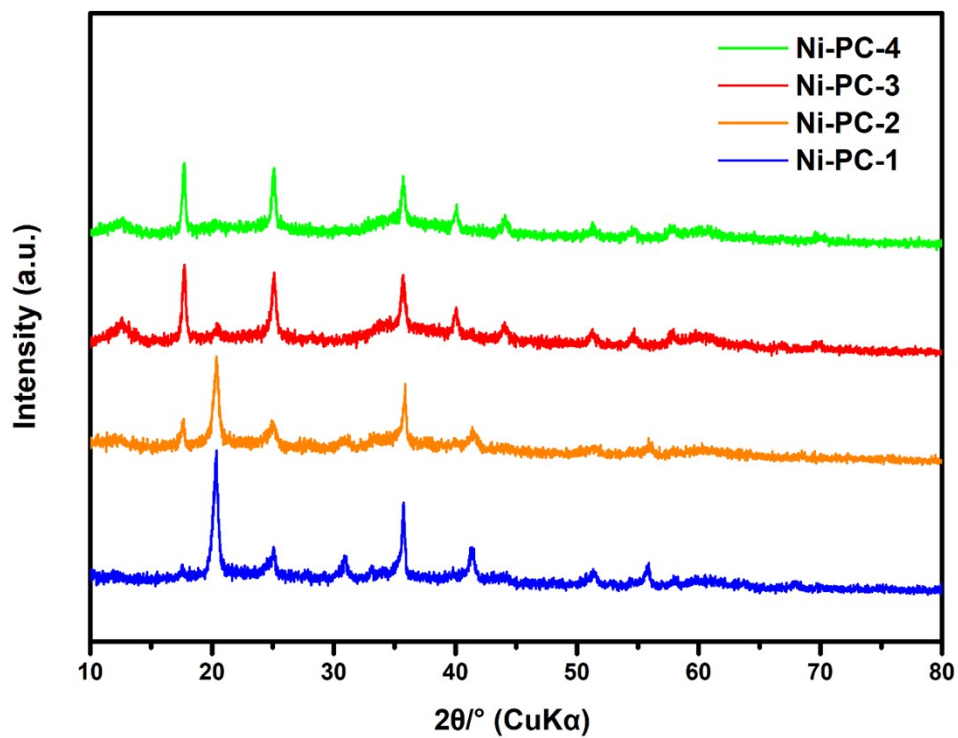

Figure S1. XRD patterns of Ni-PC-1, Ni-PC-2, Ni-PC-3 and Ni-PC-4.

Figure S2

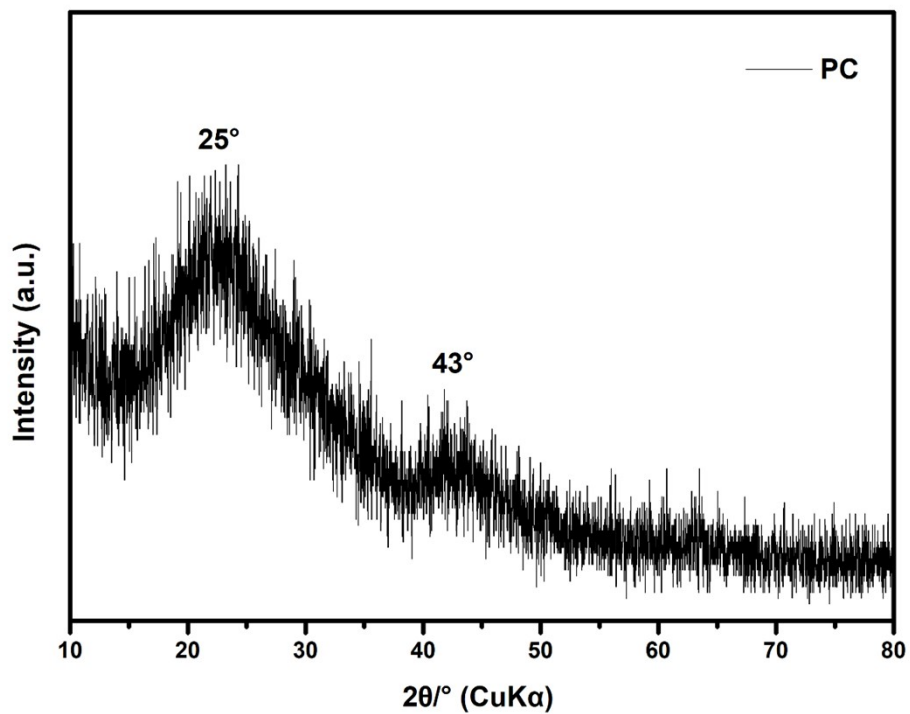

Figure S2. XRD pattern of PC.

Figure S3

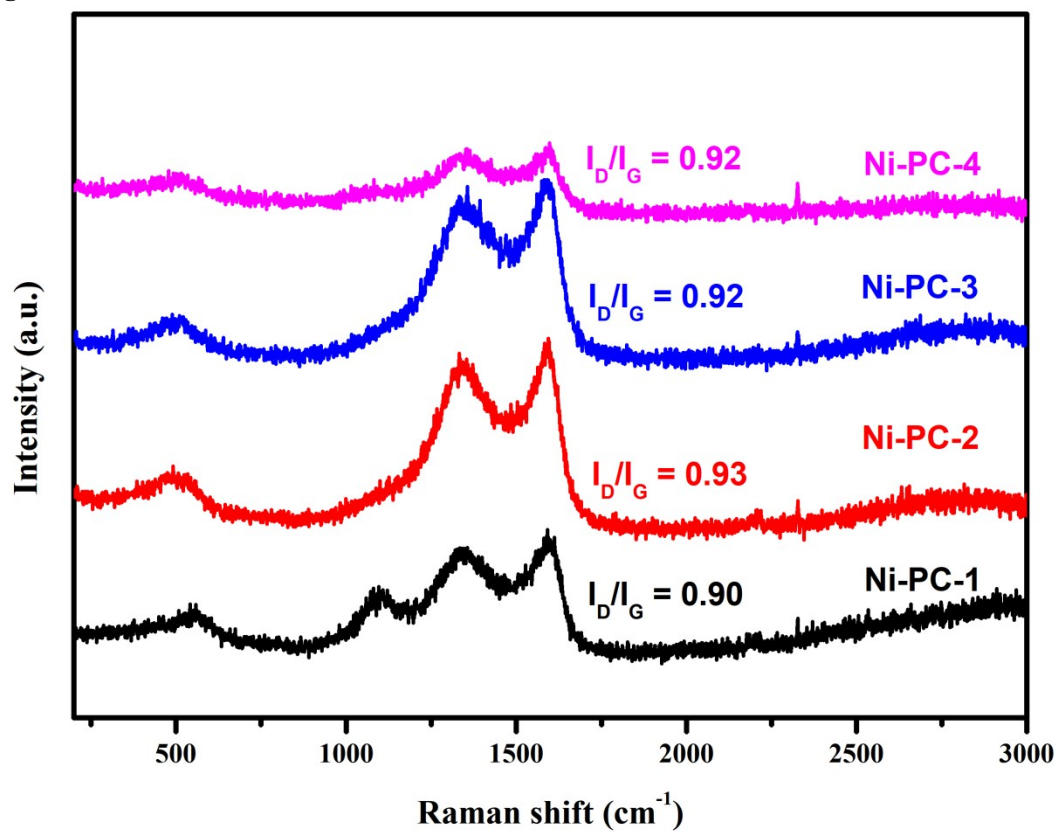

Figure S3. Raman spectra of Ni-PC-1, Ni-PC-2, Ni-PC-3 and Ni-PC-4.

Figure S4

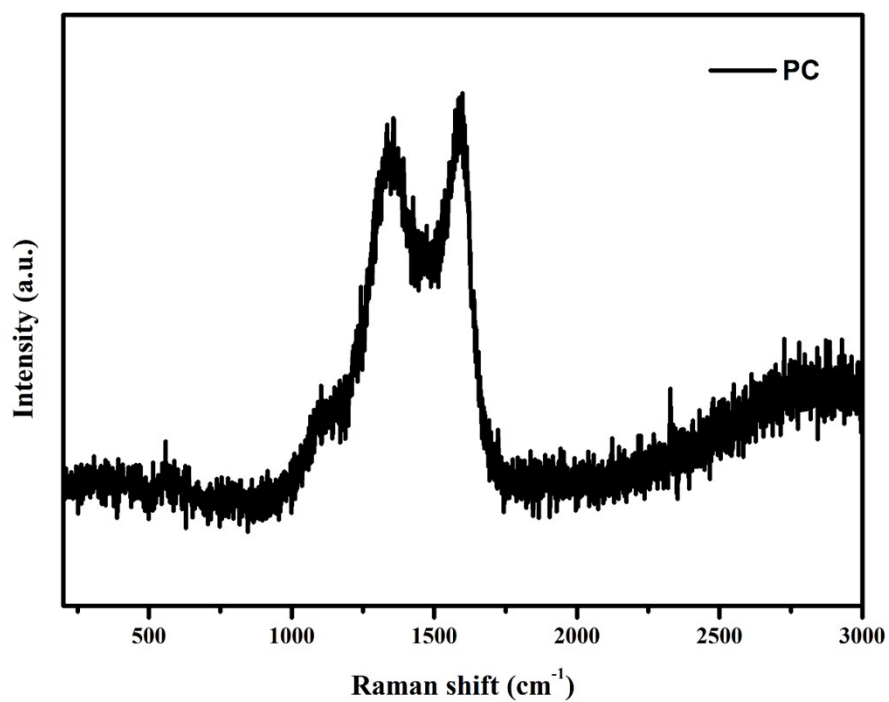

Figure S4. Raman spectrum of PC.

Figure S5

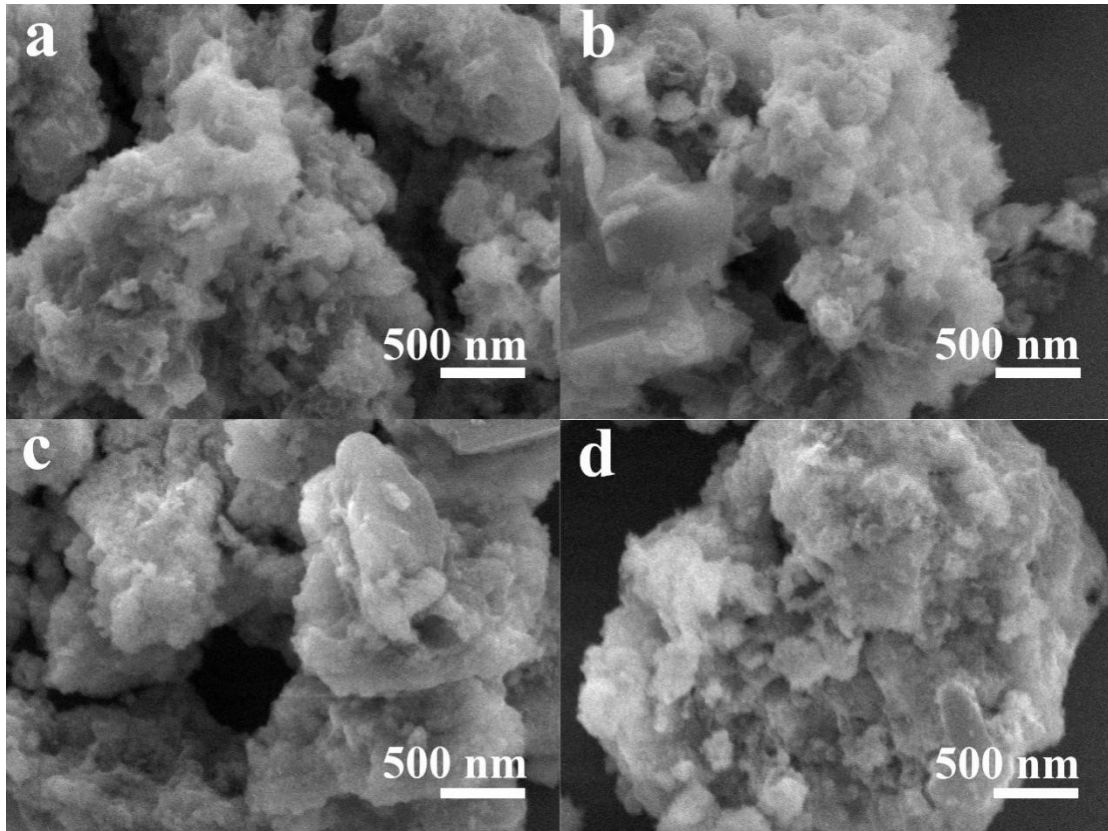

Figure S5. SEM images of Ni-PC-1 (a), Ni-PC-2 (b), Ni-PC-3 (c) and Ni-PC-4 (d).

Figure S6

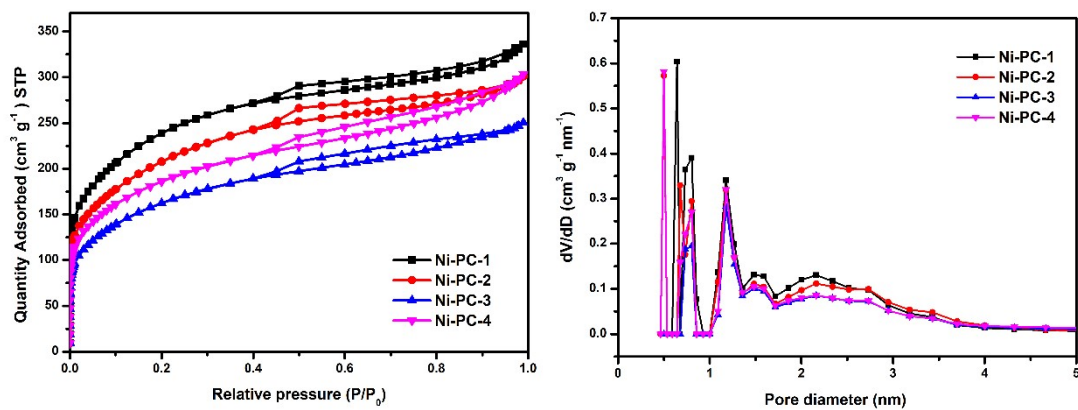

Figure S6. The nitrogen adsorption-desorption curves (a) and the pore size distribution curves (b) of Ni-PC-1, Ni-PC-2, Ni-PC-3 and Ni-PC-4.

Figure S7



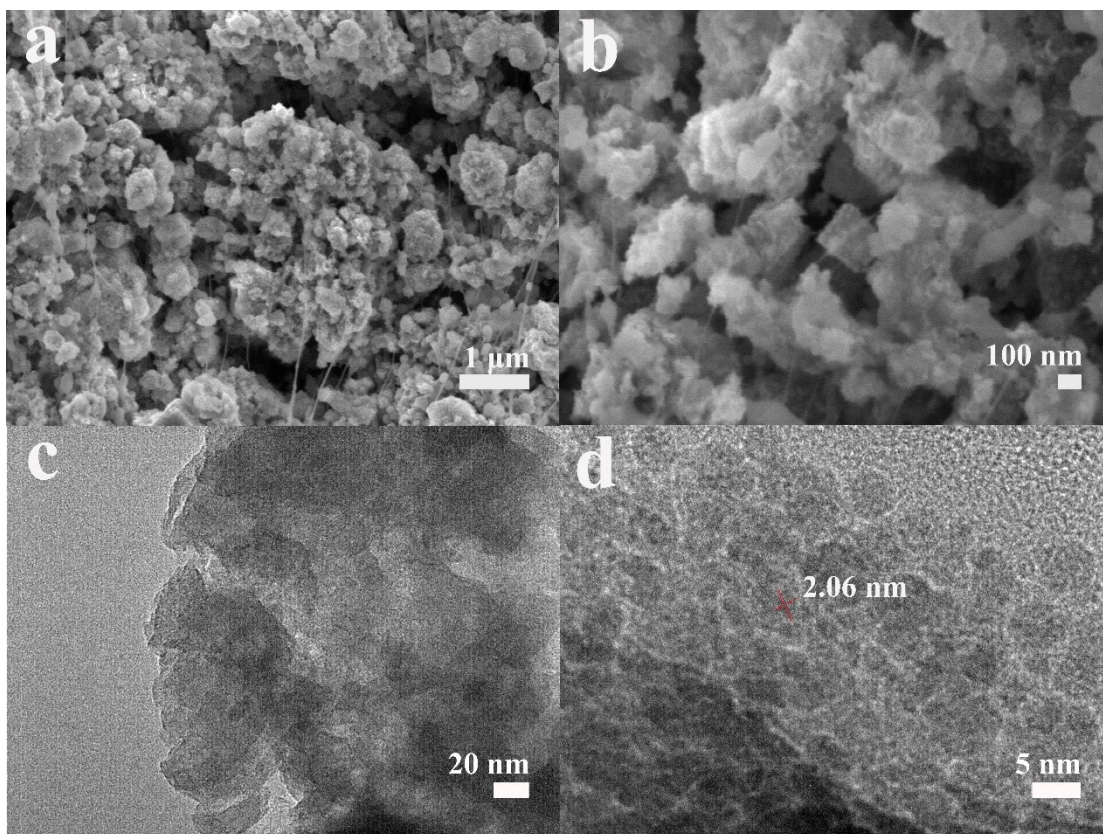

Figure S7. SEM (a, d), TEM (c), and HRTEM (d) images of Ni-PC-2 after the after the electrochemical experiment.

Figure S8

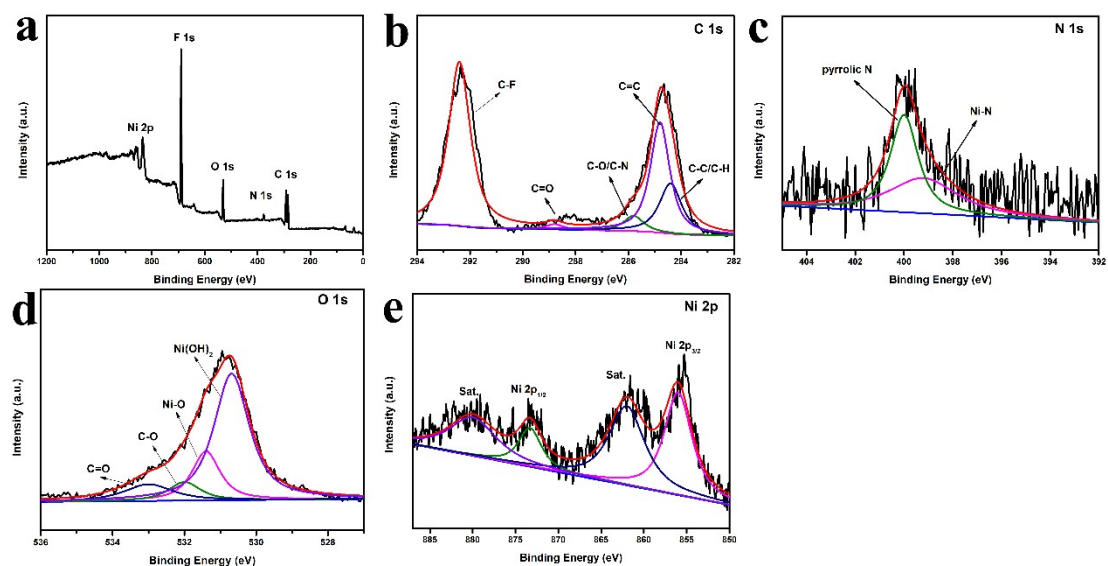

Figure S8. XPS spectra of Ni-PC-2 after the electrochemical experiment: (a) Survey XPS; (b–e) High-resolution XPS spectra of  $C_{1s}$ ,  $N_{1s}$ ,  $O_{1s}$ , and  $Ni_{2p}$ , respectively.

Figure S9

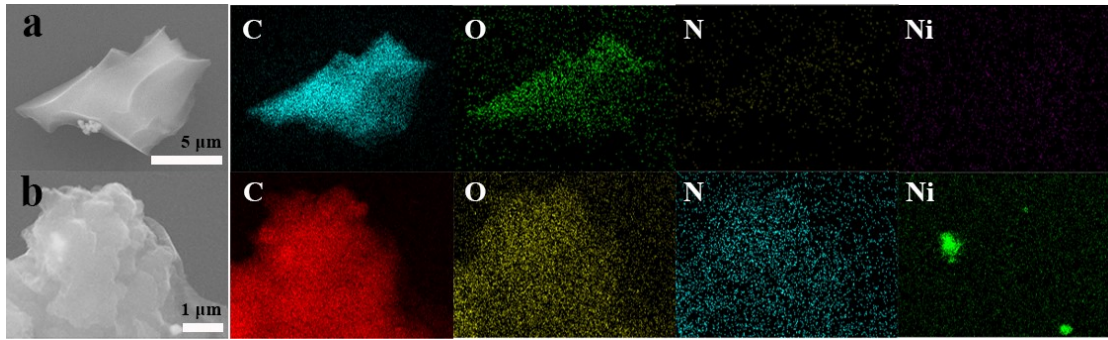

Figure S9. The SEM image and corresponding elemental mapping images of C, O, N, and Ni for Ni-PC-s-4 (a) and Ni-PC-p-16 (b).

Figure S10

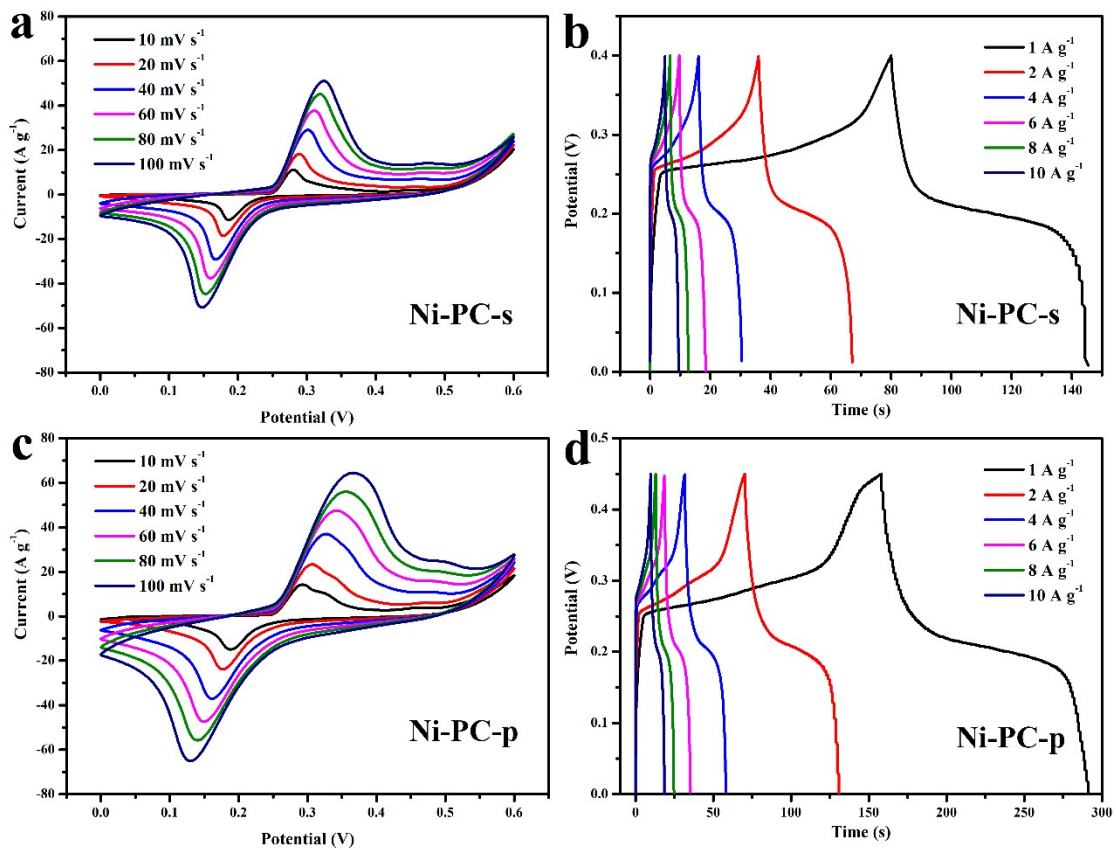

Figure S10. (a) CV and (b) GCD curves of Ni-PC-s; (c) CV and (d) GCD curves of Ni-PC-p.

Table S1. The specific capacitance and cyclic stability of Ni-PC-1, Ni-PC-2, Ni-PC-3,

and Ni-PC-4.

|            | Capacitance<br>(F g <sup>-1</sup> ) | Cycling capability<br>(after 10000 cycles) |
|------------|-------------------------------------|--------------------------------------------|
| Ni-PC-1    | 522.5                               | 111.5%                                     |
| Ni-PC-2    | 565                                 | 105.8%                                     |
| Ni-PC-3    | 427.5                               | 69.3%                                      |
| Ni-PC-4    | 285.0                               | 95.4%                                      |
| Ni-PC-s-x  | 163.5                               | 98.8%                                      |
| Ni-PC-p-4  | 178.9                               | 83.3%                                      |
| Ni-PC-p-8  | 198.4                               | 106.7%                                     |
| Ni-PC-p-16 | 295.6                               | 120.7%                                     |
| Ni-PC-p-32 | 282.4                               | 150.4%                                     |

---
